# Supplementary material for: Ignavine: a novel allosteric modulator of the μ opioid receptor
Source: Sci Rep. 2016 Aug 17;6:31748. doi: 10.1038/srep31748 (PMC4987652; doi:10.1038/srep31748)
Supplement: Supplementary Information [file srep31748-s1.pdf]

## Supplementary Figures

### **Ignavine: a novel allosteric modulator of the $\mu$ opioid receptor**

Katsuya Ohbuchi<sup>1, 2, \*</sup>, Chika Miyagi<sup>1, 2</sup>, Yasuyuki Suzuki<sup>1</sup>, Yasuharu Mizuhara<sup>1</sup>, Keita Mizuno<sup>1</sup>,  
Yuji Omiya<sup>1</sup>, Masahiro Yamamoto<sup>1</sup>, Eiji Warabi<sup>3</sup>, Yuka Sudo<sup>2, 4</sup>, Akinobu Yokoyama<sup>2, 4</sup>, Kanako  
Miyano<sup>2</sup>, Takatsugu Hirokawa<sup>5</sup>, Yasuhito Uezono<sup>2, 6</sup>

- 1) Tsumura Research Laboratories, Tsumura and Co., 3586 Yoshiwara, Ami-machi Inashiki-gun,  
Ibaraki 300-1192, Japan
- 2) Division of Cancer Pathophysiology, National Cancer Center Research Institute, 5-1-1 Tsukiji,  
Chuo-ku, Tokyo 104-0045, Japan.
- 3) Environmental Molecular Biology Laboratory, Faculty of Medicine, University of Tsukuba,  
1-1-1 Tennodai, Tsukuba-shi, Ibaraki 305-8575, Japan.
- 4) Molecular Pathology and Metabolic Disease, Faculty of Pharmaceutical Sciences, Tokyo  
University of Science, 2641 Yamazaki, Noda-shi, Chiba 278-0022, Japan.
- 5) Molecular Profiling Research Center for Drug Discovery, AIST Tokyo Waterfront Bio-IT  
Research Building 2-4-7 Aomi, Koto-ku, Tokyo 135-0064, Japan
- 6) Division of Supportive Care Research, National Cancer Center Research Institute, 5-1-1 Tsukiji,  
Chuo-ku, Tokyo 104-0045, Japan

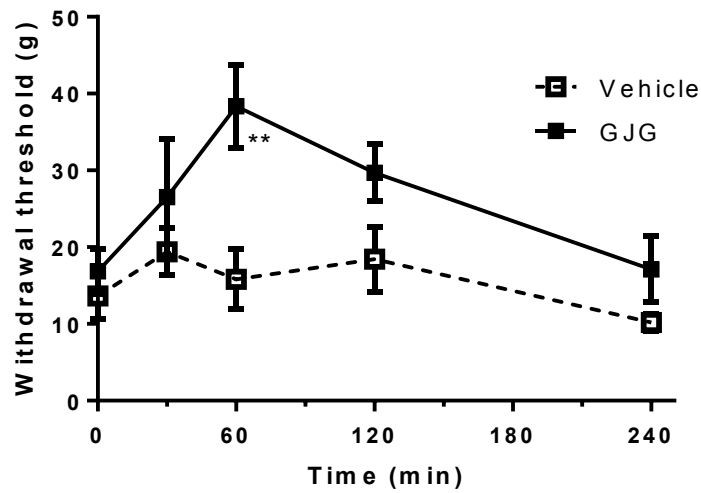

**Supplemental Figure S1.** Amelioration of mechanical allodynia by GJG in a rat CCI-neuropathic pain model. Fourteen days after CCI in the left hind paw, 2 g/kg GJG or its vehicle were orally administered and the pressure threshold of paw withdrawal was measured at each time-point. GJG significantly increased the withdrawal threshold 60 min after administration. Data shown represent mean  $\pm$  SEM ( $n = 4$  in vehicle,  $n = 5$  in GJG). \*\*  $P < 0.01$ ; by two-way ANOVA with Bonferroni's correction.

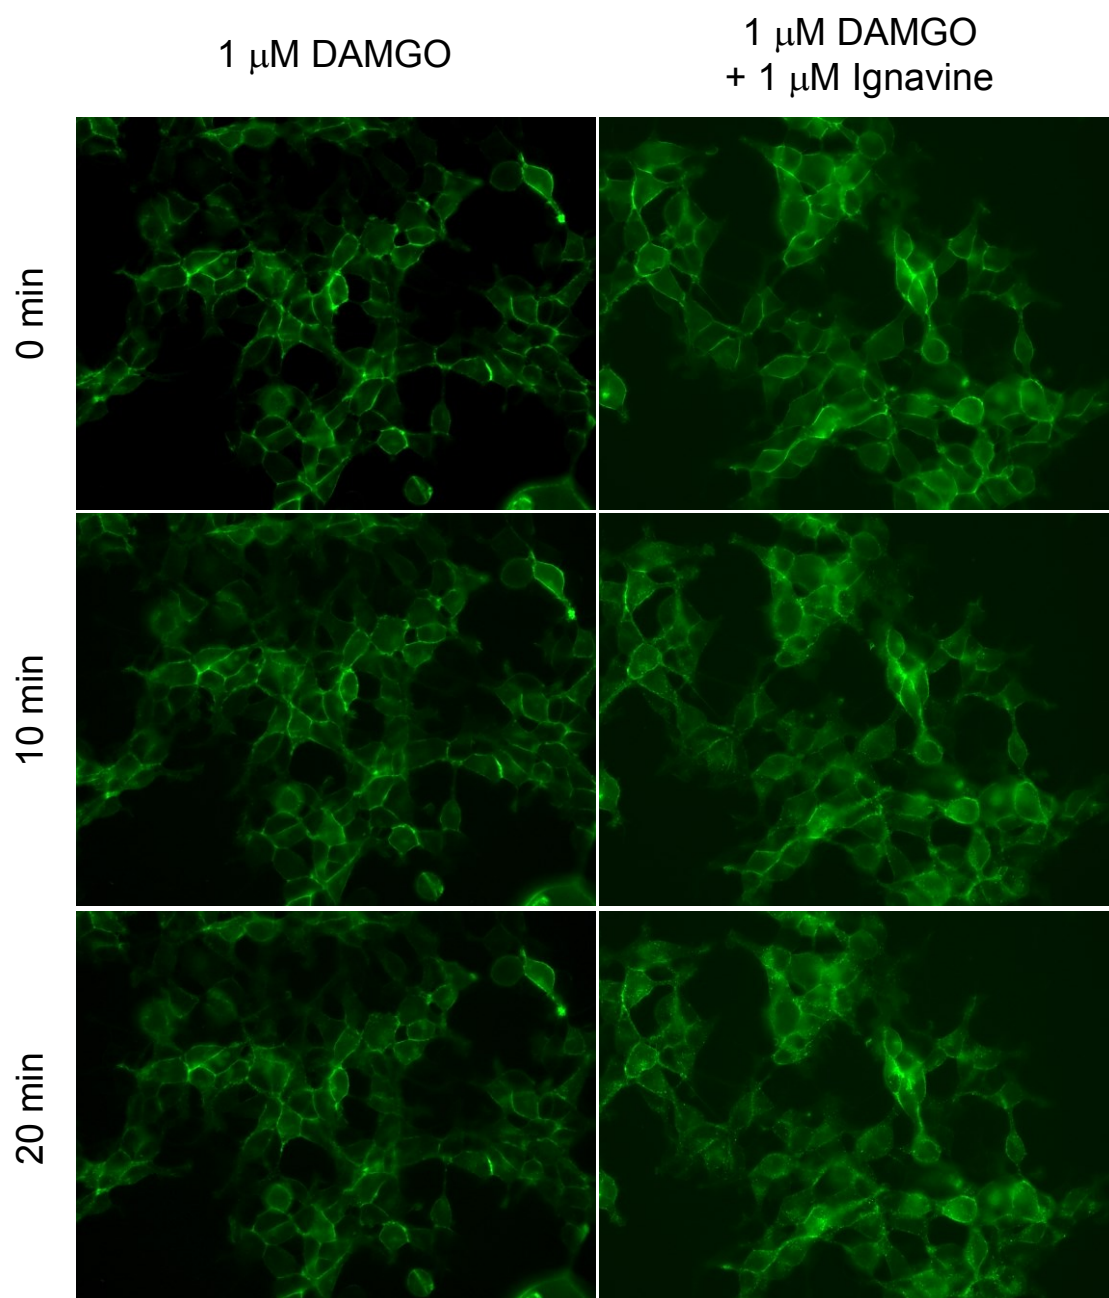

**Supplemental Figure S2.** All field views in receptor internalization assay. 1  $\mu$ M DAMGO induced receptor internalization 20 min after application. Receptor internalization was observed 10 min after application of 1  $\mu$ M DAMGO with 1  $\mu$ M ignavine.

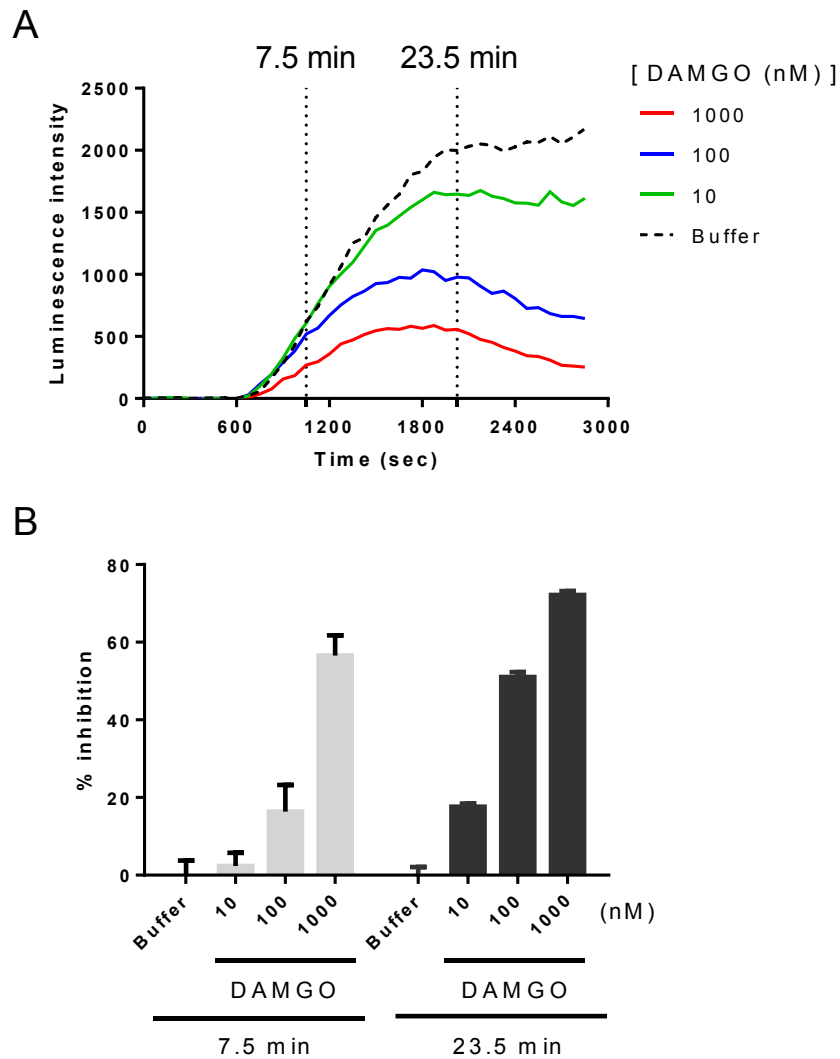

**Supplementary Figure S3.** Intracellular cAMP assay using recombinant human MOR and a GloSensor™ protein-expressing cell line. The cells were treated with DAMGO at 0 sec. Then, forskolin was added at 10 min (600 sec). **A** The amount of intracellular cAMP was traced by luminescence intensity. DAMGO inhibited the increase in intracellular cAMP in a dose-dependent manner. **B** % inhibition was calculated at 7.5 and 23.5 min after forskolin stimulation. Data shown represent mean (n = 3).

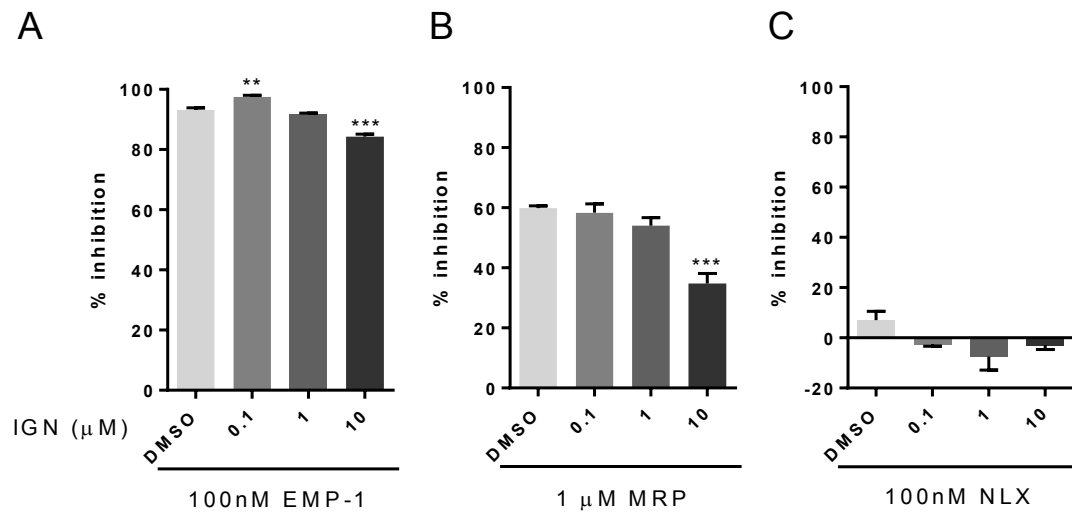

**Supplementary Figure S4.** Intracellular cAMP assay. The effect of ignavine on MOR expressing cell line in the presence of 100 nM endomorphin-1 (EMP-1, **A**), 1  $\mu$ M morphine (MRP, **B**) and 100 nM naloxone (NLX, **C**) was evaluated. % inhibition was calculated from the data obtained at 23.5 min after forskolin application. Data represent the mean  $\pm$  SEM ( $n = 3$ ). \*\*  $P < 0.01$ ; \*\*\*  $P < 0.001$  by Dunnett's test vs. vehicle.

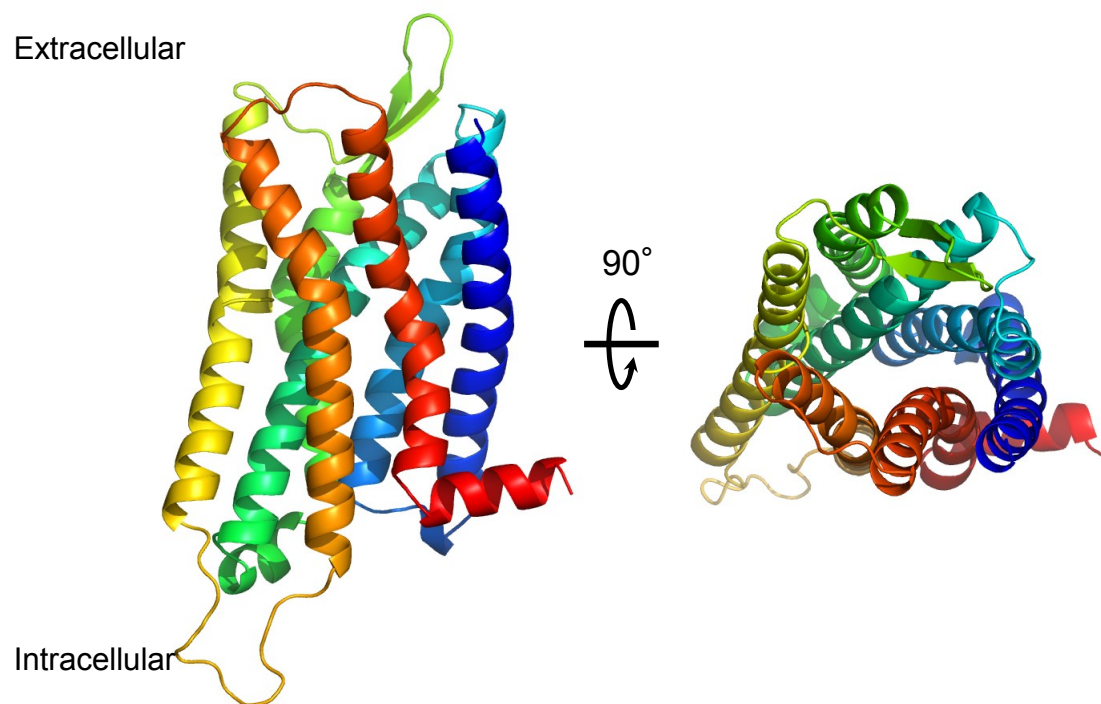

**Supplementary Figure S5.** The 3D structure of the complete human MOR homology model. The structure of the complete human MOR viewed from a position parallel to the membrane (left) and from the extracellular side (right). Each of the transmembrane helices are represented in different colors.
